# Supplementary material for: A chiral lead-free photoactive hybrid material with a narrow bandgap
Source: Royal Society of Chemistry journal article supplement (doi:10.1039/d0qi00546k), 2020-01-01
Supplement: d0qi00546k1.pdf [file d0qi00546k1.pdf]

## Supporting Information

### A Chiral Lead-Free Photoactive Hybrid Material with a Narrow Band Gap

Yaobin Li,<sup>a,b</sup> Tao Yang,<sup>a</sup> Xitao Liu,<sup>a,c</sup> Shiguo Han,<sup>a</sup> Jiaqi Wang,<sup>a</sup> Yu Ma,<sup>a</sup> Wuqian Guo,<sup>a</sup> Junhua Luo<sup>a</sup> and Zihua Sun<sup>\*a,c</sup>

<sup>a</sup>. State Key Laboratory of Structural Chemistry, Fujian Institute of Research on the Structure of Matter, Chinese Academy of Sciences, Fuzhou, Fujian, 350002, P. R. China

<sup>b</sup>. College of Chemistry and Materials Science, Fujian Normal University, Fuzhou, Fujian 350007, P. R. China

<sup>c</sup>. Universities of the Chinese Academy of Sciences, Beijing 100039, P. R. China

\*Correspondence: [sunzihua@fjirsm.ac.cn](mailto:sunzihua@fjirsm.ac.cn)

#### Table of Contents:

##### Figure:

|                                                                                                     |     |
|-----------------------------------------------------------------------------------------------------|-----|
| <b>Figure S1.</b> Crystal structure of <b>1</b> . .....                                             | -2- |
| <b>Figure S2.</b> Experimental and simulated X-ray powder diffraction patterns for <b>1</b> . ..... | -2- |
| <b>Figure S3.</b> Partial density of states (PDOS) of <b>1</b> . .....                              | -3- |
| <b>Figure S4.</b> Arrhenius plot relating to the dependence of conductivity on temperature.....     | -3- |
| <b>Figure S5.</b> SEM images of crystal surface for <b>1</b> . .....                                | -4- |
| <b>Figure S6.</b> Thermogravimetric (TG) curve of <b>1</b> . .....                                  | -4- |

##### Table:

|                                                    |     |
|----------------------------------------------------|-----|
| <b>Table S1.</b> Crystal data for <b>1</b> . ..... | -5- |
| <b>Table S2.</b> Bond lengths for <b>1</b> . ..... | -6- |
| <b>Table S3.</b> Bond angles for <b>1</b> . .....  | -6- |

Figure

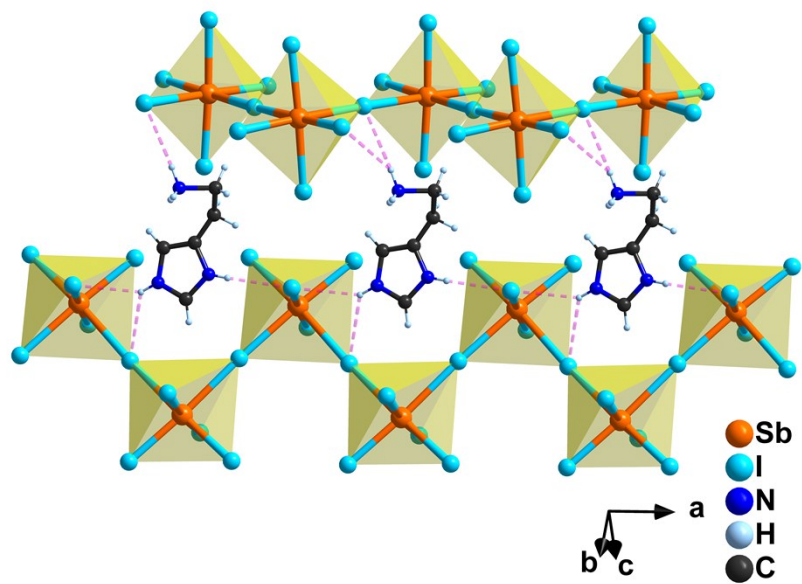

Figure S1. Crystal structure of **1**.

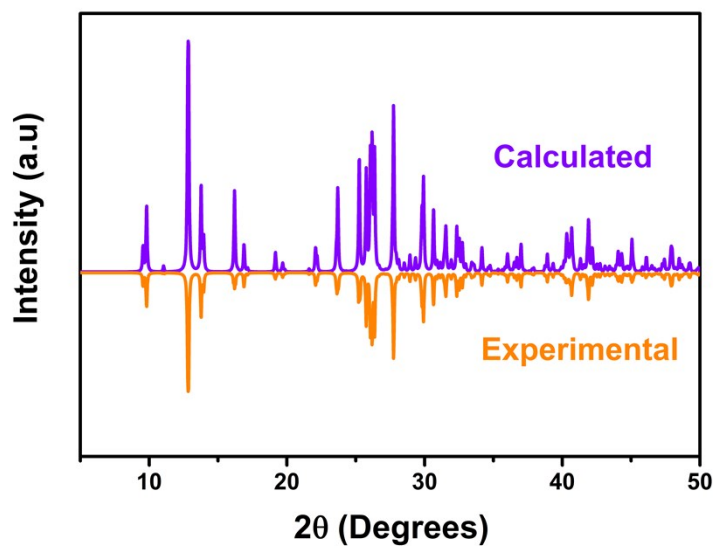

Figure S2. Experimental and simulated X-ray powder diffraction patterns for **1**.

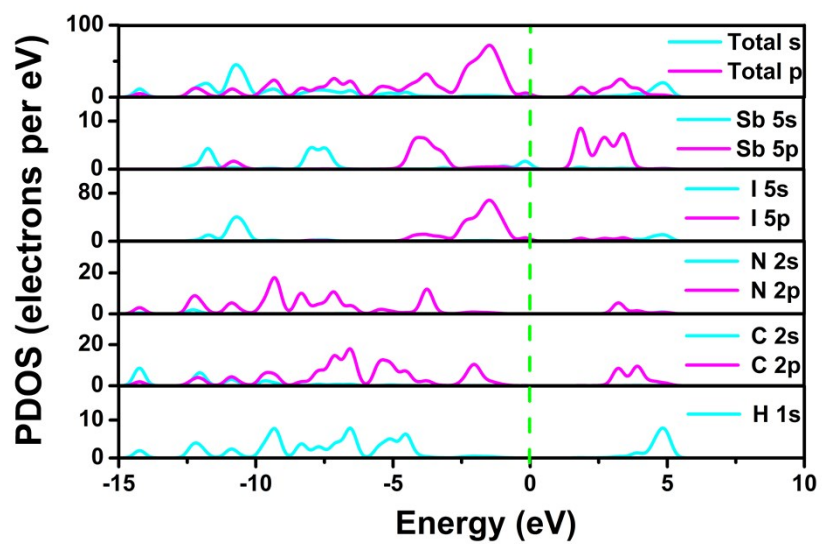

Figure S3. Partial density of states (PDOS) of 1.

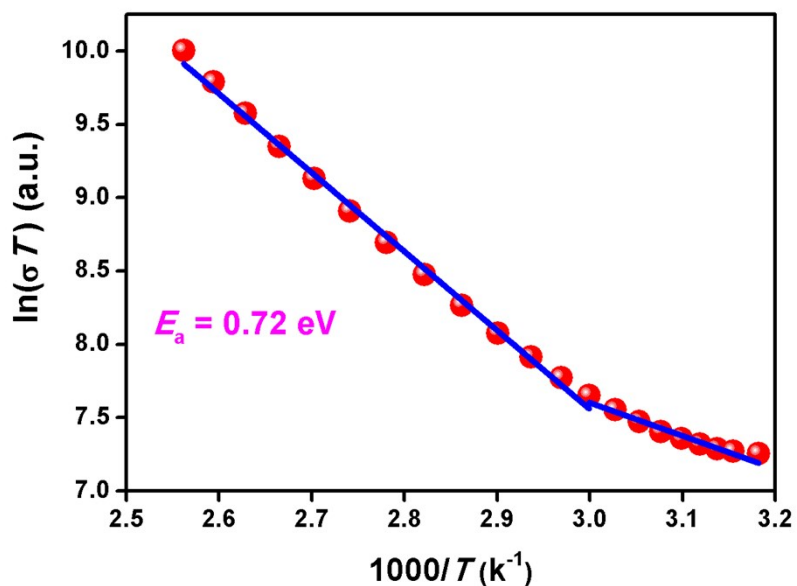

Figure S4. Arrhenius plot relating to the dependence of conductivity on temperature

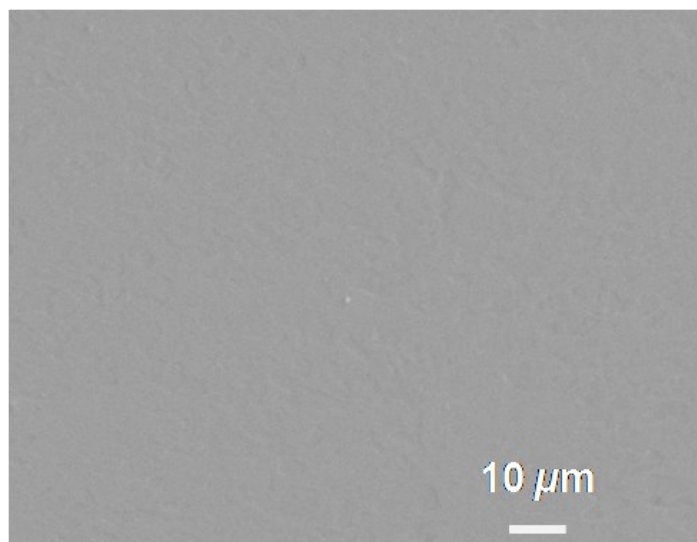

Figure S5. SEM images of crystal surface for **1**.

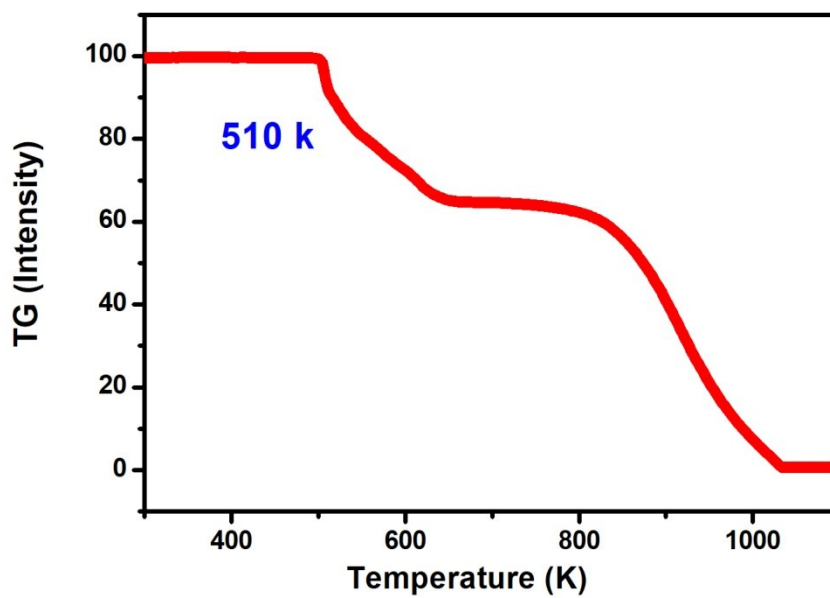

Figure S6. Thermogravimetric (TG) curve of **1**.

**Table S1.** Crystal data for 1

|                                                                   |                                                                                                                 |
|-------------------------------------------------------------------|-----------------------------------------------------------------------------------------------------------------|
| Empirical formula                                                 | C <sub>5</sub> H <sub>11</sub> I <sub>5</sub> N <sub>3</sub> Sb                                                 |
| Formula weight                                                    | 869.42                                                                                                          |
| Temperature/K                                                     | 320.02                                                                                                          |
| Crystal system                                                    | orthorhombic                                                                                                    |
| Space group                                                       | <i>P</i> 2 <sub>1</sub> 2 <sub>1</sub> 2 <sub>1</sub>                                                           |
| Cell parameters                                                   | <i>a</i> = 8.9312(2)<br><i>b</i> = 10.7807(3)<br><i>c</i> = 18.0106(6)<br>$\beta$ = 90<br><i>V</i> = 1734.14(8) |
| Z, Calculated density                                             | 4, 3.330 g/cm <sup>3</sup>                                                                                      |
| <i>F</i> (000)                                                    | 1512.0                                                                                                          |
| Radiation                                                         | MoK $\alpha$ ( $\lambda$ = 0.71073)                                                                             |
| Theta range                                                       | 4.404 to 54.276 °<br>-11 $\leq h \leq$ 11,                                                                      |
| Limiting indices                                                  | -13 $\leq k \leq$ 6,<br>-28 $\leq l \leq$ 21                                                                    |
| Reflections collected / unique                                    | 14571/3823 ( <i>R</i> <sub>int</sub> = 0.0529)                                                                  |
| Data/restraints/parameters                                        | 3823/99/120                                                                                                     |
| GOF.                                                              | 1.044                                                                                                           |
| Final <i>R</i> indexes [ <i>I</i> $\geq$ 2 $\sigma$ ( <i>I</i> )] | <i>R</i> <sub>1</sub> = 0.0521, $\omega R$ <sub>2</sub> = 0.1282                                                |
| <i>R</i> indexes (all data)                                       | <i>R</i> <sub>1</sub> = 0.0711, $\omega R$ <sub>2</sub> = 0.1431                                                |

**Table S2.** Bond lengths for 1.

| Atom | Atom             | Length/Å  | Atom | Atom | Length/Å  |
|------|------------------|-----------|------|------|-----------|
| Sb1  | I2               | 2.8952(8) | N1   | C1   | 1.4200    |
| Sb1  | I1               | 3.0008(8) | C2   | C3   | 1.4200    |
| Sb1  | I3               | 2.8604(8) | C3   | N2   | 1.4200    |
| Sb1  | I5               | 3.1750(8) | C3   | C4   | 1.446(11) |
| Sb1  | I5 <sup>#1</sup> | 3.2270(8) | N2   | C1   | 1.4200    |
| Sb1  | I4               | 3.0371(8) | C4   | C5   | 1.435(12) |
| N1   | C2               | 1.4200    | N3   | C5   | 1.456(12) |

#1 -1/2+X,3/2-Y,1-Z

**Table S3.** Bond angles for 1.

| Bond                    | Angle/°    | Bond                     | Angle/°   |
|-------------------------|------------|--------------------------|-----------|
| I2-Sb1-I1               | 90.27(2)   | I4-Sb1-I5                | 88.51(2)  |
| I2-Sb1-I5               | 176.75(3)  | I4-Sb1-I51               | 88.91(2)  |
| I2-Sb1-I5 <sup>#1</sup> | 88.83(2)   | Sb1-I5-Sb1 <sup>#2</sup> | 176.71(3) |
| I2-Sb1-I4               | 89.52(2)   | C2-N1-C1                 | 108.0     |
| I1-Sb1-I5 <sup>#1</sup> | 87.51(2)   | N1-C2-C3                 | 108.0     |
| I1-Sb1-I5               | 91.53(2)   | C2-C3-N2                 | 108.0     |
| I1-Sb1-I4               | 176.42(3)  | C2-C3-C4                 | 136.9(9)  |
| I3-Sb1-I2               | 94.64(2)   | N2-C3-C4                 | 115.0(9)  |
| I3-Sb1-I1               | 92.42(2)   | C1-N2-C3                 | 108.0     |
| I3-Sb1-I5 <sup>#1</sup> | 176.53(3)  | N2-C1-N1                 | 108.0     |
| I3-Sb1-I5               | 87.98(2)   | C5-C4-C3                 | 145.1(11) |
| I3-Sb1-I4               | 91.16(2)   | C4-C5-N3                 | 90.4(9)   |
| I5-Sb1-I5 <sup>#1</sup> | 88.549(11) |                          |           |

#1 -1/2+X,3/2-Y,1-Z; #2 1/2+X,3/2-Y,1-Z
